# Supplementary material for: Cerebrospinal fluid lens-free microscopy: a new tool for the laboratory diagnosis of meningitis
Source: PubMed Central journal article supplement (PMC5206666; doi:10.1038/srep39893), 2017-01-03
Supplement: srep39893-s2.pdf [file srep39893-s2.pdf]

| CSF   | Operator 1 | Operator 2 | Operator 3 | Operator 4 | Operator 5 |
|-------|------------|------------|------------|------------|------------|
| 1 WC  | 3          | 3          | 0          | 1          | 5          |
| 1 RC  | 14         | 10         | 0          | 7          | 13         |
| 2 WC  | 0          | 0          | 1          | 0          | 0          |
| 2 RC  | 0          | 1          | 0          | 0          | 0          |
| 3 WC  | 1          | 0          | 0          | 0          | 0          |
| 3 RC  | 2          | 0          | 2          | 4          | 1          |
| 4 RC  | 0          | 0          | 0          | 2          | 0          |
| 4 RC  | 1500       | 1400       | 800        | 2000       | 1500       |
| 5 WC  | 0          | 0          | 0          | 1          | 1          |
| 5 RC  | 6          | 3          | 1          | 5          | 4          |
| 6 WC  | 12         | 7          | 5          | 12         | 9          |
| 6 RC  | 200        | 150        | 300        | 350        | 350        |
| 7 WC  | 0          | 0          | 0          | 0          | 0          |
| 7 RC  | 0          | 1          | 1          | 0          | 0          |
| 8 WC  | 5          | 3          | 31         | 3          | 6          |
| 8 RC  | 10         | 10         | 17         | 9          | 13         |
| 9 WC  | 90         | 62         | 95         | 74         | 87         |
| 9 RC  | 1500       | 1000       | 1200       | 1400       | 1500       |
| 10 WC | 1          | 0          | 1          | 1          | 1          |
| 10 RC | 1          | 1          | 2          | 5          | 3          |
| 1 WC  | 5          | 5          | 6          | 7          | 15         |
| 1 RC  | 5          | 6          | 7          | 8          | 23         |
| 2 WC  | 15         | 20         | 20         | 25         | 25         |
| 2 RC  | 3          | 4          | 4          | 5          | 4          |
| 3 WC  | 7          | 8          | 9          | 11         | 9          |
| 3 RC  | 5          | 6          | 7          | 8          | 8          |
| 4 WC  | 5          | 6          | 7          | 7          | 7          |
| 4 RC  | 40         | 50         | 63         | 62         | 50         |
| 5 WC  | 10         | 13         | 20         | 18         | 16         |
| 5 RC  | 1          | 3          | 2          | 1          | 2          |
| 6 WC  | 0          | 0          | 0          | 0          | 0          |
| 6 RC  | 10000      | 10000      | 10000      | 10000      | 10000      |
| 7 WC  | 5          | 6          | 6          | 7          | 5          |
| 7 RC  | 10         | 12         | 13         | 10         | 20         |
| 8 WC  | 0          | 0          | 0          | 0          | 0          |
| 8 RC  | 0          | 0          | 0          | 0          | 0          |
| 9 WC  | 100        | 130        | 122        | 131        | 117        |
| 9 RC  | 10000      | 10000      | 10000      | 10000      | 10000      |
| 10 WC | 0          | 0          | 0          | 0          | 1          |
| 10 RC | 35         | 40         | 36         | 40         | 36         |
| 1 WC  | 239        | 280        | 292        | 275        | 303        |
| 1 RC  | 833        | 750        | 875        | 700        | 889        |
| 2 WC  | 0          | 1          | 0          | 1          | 0          |
| 2 RC  | 0          | 1          | 0          | 1          | 0          |
| 3 WC  | 7          | 4          | 4          | 5          | 5          |
| 3 RC  | 9          | 12         | 11         | 10         | 10         |
| 4 WC  | 0          | 0          | 43         | 0          | 0          |
| 4 RC  | 10000      | 10000      | 10000      | 10000      | 10000      |

|       |      |      |      |      |      |
|-------|------|------|------|------|------|
| 5 WC  | 2    | 3    | 2    | 2    | 3    |
| 5 RC  | 6    | 12   | 10   | 8    | 7    |
| 6 WC  | 1    | 0    | 0    | 0    | 0    |
| 6 RC  | 0    | 0    | 3    | 0    | 0    |
| 7 WC  | 26   | 18   | 40   | 25   | 24   |
| 7 RC  | 256  | 312  | 420  | 300  | 322  |
| 8 WC  | 0    | 0    | 0    | 7    | 5    |
| 8 RC  | 300  | 320  | 324  | 411  | 426  |
| 9 WC  | 60   | 56   | 52   | 62   | 100  |
| 9 RC  | 30   | 33   | 31   | 30   | 45   |
| 10 WC | 0    | 1    | 0    | 1    | 1    |
| 10 RC | 0    | 0    | 0    | 0    | 0    |
| 1 WC  | 10   | 15   | 12   | 22   | 18   |
| 1 RC  | 30   | 32   | 44   | 51   | 50   |
| 2 WC  | 1    | 0    | 2    | 0    | 10   |
| 2 RC  | 35   | 40   | 42   | 30   | 31   |
| 3 WC  | 8    | 2    | 0    | 9    | 8    |
| 3 RC  | 148  | 245  | 200  | 310  | 200  |
| 4 WC  | 1    | 2    | 1    | 9    | 4    |
| 4 RC  | 1600 | 1200 | 2000 | 2584 | 1586 |
| 5 WC  | 0    | 0    | 0    | 0    | 0    |
| 5 RC  | 2    | 2    | 3    | 2    | 2    |
| 6 WC  | 2    | 2    | 3    | 8    | 1    |
| 6 RC  | 5    | 5    | 7    | 15   | 2    |

Supplementary Table 1. Interoperator (5 operators) variability in cerebrospinal fluid cell counting by standard optic microscopy.

CSF:

cerebrospinal fluid

RC: Red cells

WC: White cells
